# Supplementary material
Source: HighWire-hosted journal article supplement (https://drc.bmj.com/content/8/1/e001187)

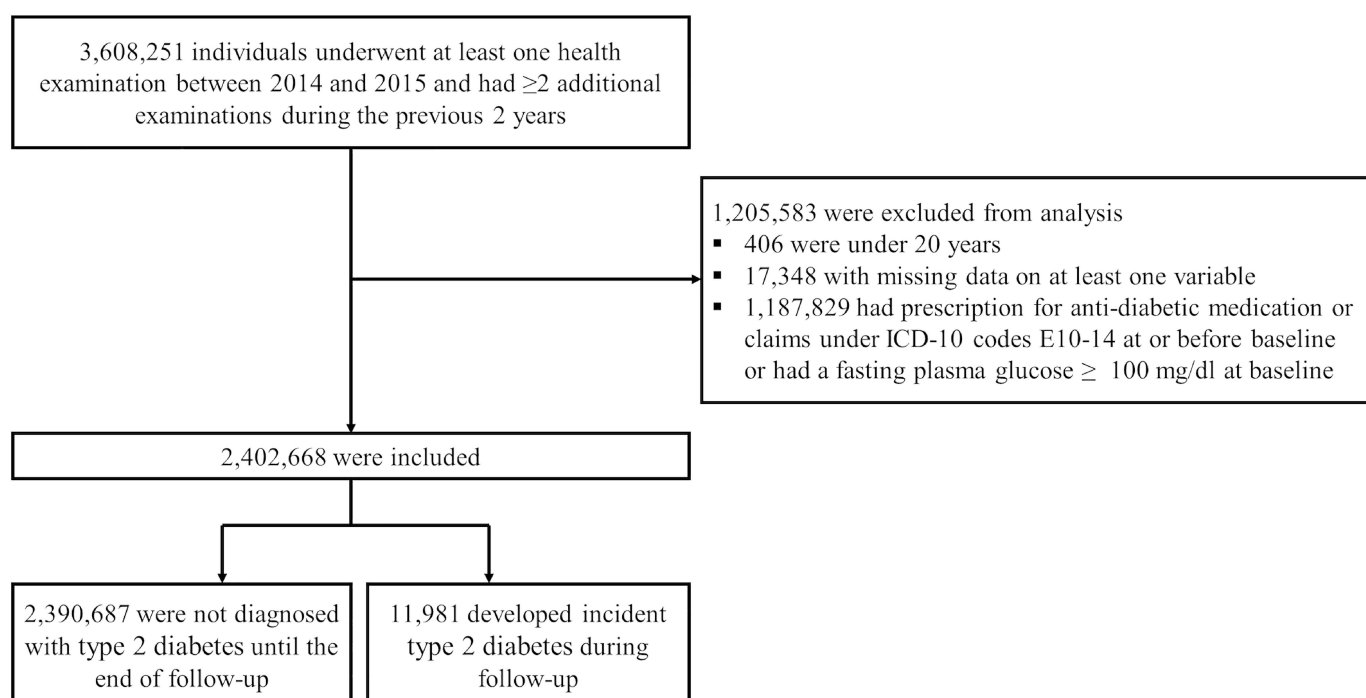

Supplement: inline-supplementary-material-1 [file inline-supplementary-material-1.pdf]
